# Supplementary material
Source: Springer Nature journal article supplement (https://www.springermedizin.de/resource/supplementary/12937_2010_334_MOESM2_ESM.pdf/25653078)

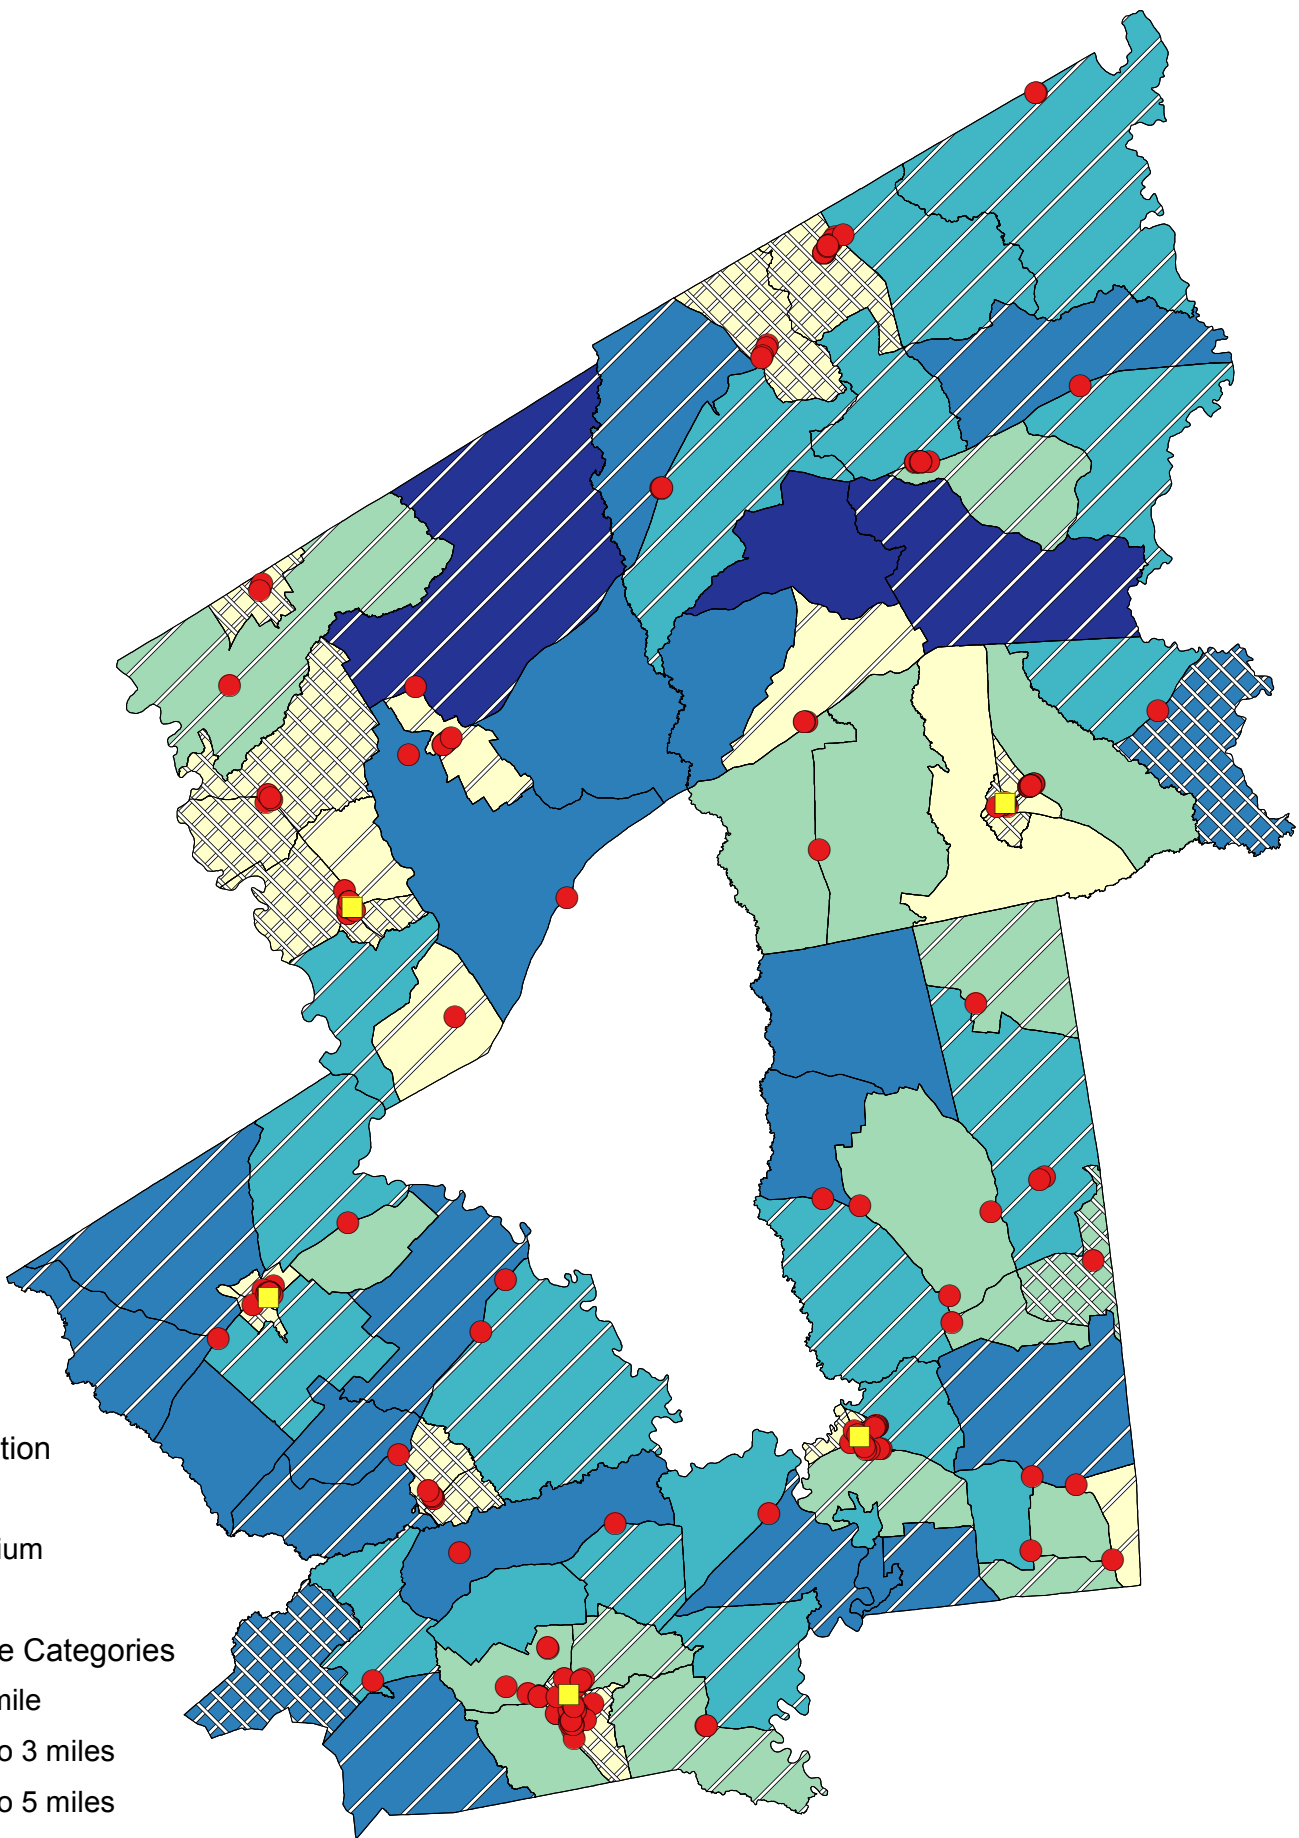

Deprivation

- Low
- Medium
- High

Distance Categories

- ≤ 1 mile
- > 1 to 3 miles
- > 3 to 5 miles
- > 5 to 10 miles
- > 10 miles

- Fast Food Opportunities
- Urban Clusters

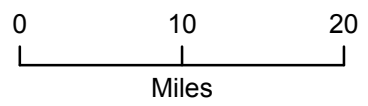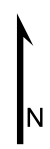

Supplement: MOESM2 [file 25653078]
